# Supplementary material for: Knowledge, Attitudes and Practices of Veterinarians Towards Antimicrobial Resistance and Stewardship in Nigeria
Source: MDPI journal article supplement (doi:10.3390/antibiotics9080453), 2020-07-28
Supplement: s1 [file s1]

## Supplementary Materials: Tables S1-S9

**Table S1.** Knowledge of appropriate antibiotics use and AMR among respondents

| Variables                                                                                                                                 | Response                                                                                                    | Frequency<br>(n=241) | Percentage<br>(%) |
|-------------------------------------------------------------------------------------------------------------------------------------------|-------------------------------------------------------------------------------------------------------------|----------------------|-------------------|
| Antibiotics kill or stop the growth of both good and bad bacteria                                                                         | True                                                                                                        | 220                  | 91.3              |
|                                                                                                                                           | False                                                                                                       | 20                   | 8.3               |
|                                                                                                                                           | Unknown                                                                                                     | 1                    | 0.4               |
| Antibiotics kill viruses                                                                                                                  | True                                                                                                        | 10                   | 4.2               |
|                                                                                                                                           | False                                                                                                       | 225                  | 93.4              |
|                                                                                                                                           | Unknown                                                                                                     | 6                    | 2.5               |
| Overuse of antibiotics makes them become ineffective                                                                                      | True                                                                                                        | 228                  | 94.6              |
|                                                                                                                                           | False                                                                                                       | 8                    | 3.3               |
|                                                                                                                                           | Unknown                                                                                                     | 5                    | 2.1               |
| Bacteria can become resistant to antibiotics                                                                                              | True                                                                                                        | 241                  | 100               |
|                                                                                                                                           | False                                                                                                       | 0                    | 0                 |
|                                                                                                                                           | Unknown                                                                                                     | 0                    | 0                 |
| Healthy people and animals can carry antibiotic resistant bacteria                                                                        | Agree                                                                                                       | 190                  | 78.8              |
|                                                                                                                                           | Neither agree/nor disagree                                                                                  | 26                   | 10.8              |
| In what microbes is antibiotic resistance a major problem?*                                                                               | Bacteria                                                                                                    | 236                  | 97.9              |
|                                                                                                                                           | Fungi                                                                                                       | 53                   | 22.0              |
|                                                                                                                                           | Protozoa                                                                                                    | 48                   | 19.9              |
|                                                                                                                                           | Helminths                                                                                                   | 38                   | 15.8              |
|                                                                                                                                           | Viruses                                                                                                     | 30                   | 12.5              |
| Do you think overuse of antibiotics can lead to development of resistant organisms?                                                       | No                                                                                                          | 6                    | 2.5               |
|                                                                                                                                           | Yes                                                                                                         | 227                  | 94.2              |
|                                                                                                                                           | Don't know                                                                                                  | 8                    | 3.3               |
| A withdrawal period does not have to be observed for milking cows treated with antibiotics such as penicillin before milk can be consumed | True                                                                                                        | 14                   | 5.8               |
|                                                                                                                                           | False                                                                                                       | 225                  | 93.4              |
|                                                                                                                                           | Unknown                                                                                                     | 2                    | 0.8               |
| A withdrawal period has to be strictly observed in treated poultry before any poultry product is passed as fit for human consumption      | True                                                                                                        | 236                  | 97.9              |
|                                                                                                                                           | False                                                                                                       | 4                    | 1.7               |
|                                                                                                                                           | Unknown                                                                                                     | 1                    | 0.4               |
| What is the difference between an antimicrobial and an antibiotic?                                                                        | Antibiotics kill and or stop the growth of bacteria, whereas antimicrobials kill viruses, fungi or bacteria | 197                  | 81.8              |
|                                                                                                                                           | Antibiotics are naturally occurring compounds and not synthetic compounds                                   | 24                   | 10                |
|                                                                                                                                           | An antibiotic is the same as an antimicrobial                                                               | 16                   | 6.7               |
|                                                                                                                                           | Don't know                                                                                                  | 4                    | 1.7               |
|                                                                                                                                           |                                                                                                             |                      |                   |

|                                                                                                                             |                                                                                                                                                                                                                                          |     |      |
|-----------------------------------------------------------------------------------------------------------------------------|------------------------------------------------------------------------------------------------------------------------------------------------------------------------------------------------------------------------------------------|-----|------|
| Have you ever heard the term "antibiotic stewardship" or "antimicrobial stewardship"?                                       | No                                                                                                                                                                                                                                       | 152 | 63.1 |
|                                                                                                                             | Yes                                                                                                                                                                                                                                      | 89  | 36.9 |
| Which of the following do you think best defines antibiotic stewardship or antimicrobial stewardship? **                    | All of the above                                                                                                                                                                                                                         | 61  | 68.5 |
|                                                                                                                             | A coordinated intervention designed to improve and measure the appropriate use of antibiotics by promoting the selection of the optimal antimicrobial drug regimen, dose, duration of therapy and route of administration.               | 11  | 12.4 |
|                                                                                                                             | Optimal selection, dosage, and duration of antibiotic treatment that results in the best clinical outcome for the treatment or prevention of infection, with minimal toxicity to the patient and minimal impact on subsequent resistance | 9   | 10.1 |
|                                                                                                                             | A systematic effort to educate and persuade prescribers of antibiotics to follow evidence-based prescribing, in order to stem antibiotic overuse, and thus antibiotic resistance.                                                        | 8   | 9    |
|                                                                                                                             | None of the above                                                                                                                                                                                                                        | 0   | 0    |
|                                                                                                                             |                                                                                                                                                                                                                                          |     |      |
| Have you read or heard of the Nigeria Center for Disease Control 5-point action plan for responsible use of antimicrobials? | No                                                                                                                                                                                                                                       | 144 | 59.8 |
|                                                                                                                             | Yes                                                                                                                                                                                                                                      | 97  | 40.3 |
| Of the following, which topics would you like to receive more information on?*                                              | Links between the health of humans, animals and the environment                                                                                                                                                                          | 182 | 75.5 |
|                                                                                                                             | Guidelines to use of antibiotics                                                                                                                                                                                                         | 148 | 61.4 |
|                                                                                                                             | Resistance to antibiotics and how resistance develops                                                                                                                                                                                    | 146 | 60.6 |
|                                                                                                                             | Critically important antimicrobials                                                                                                                                                                                                      | 144 | 59.8 |
|                                                                                                                             | Animal disease conditions for which antibiotics are used or should be used                                                                                                                                                               | 143 | 59.3 |
|                                                                                                                             | Microbiological culture and sensitivity testing                                                                                                                                                                                          | 134 | 55.6 |

\* The results for this variable are presented as row percentages instead of column percentages, as such the column percentages for this variable do not add up to 100%.

\*\*The denominator used for this question was 89. Only respondents that answered "yes" (n=89) to the previous question "Have you ever heard the term "antibiotic stewardship" or "antimicrobial stewardship"?" were assessed in this question.

**Table S2.** Attitudes of respondents towards antibiotic use and antimicrobial resistance (AMR)

| Variables                                                                                                          | Response                                                      | Frequency<br>(n=241) | Percentage<br>(%) |
|--------------------------------------------------------------------------------------------------------------------|---------------------------------------------------------------|----------------------|-------------------|
| Of the following potential contributors to antibiotic resistance, which ones do you consider the most important?*  | Excessive use of antibiotics in livestock and food production | 202                  | 83.8              |
|                                                                                                                    | Under-dosing of antibiotics                                   | 185                  | 76.8              |
|                                                                                                                    | Long duration of antibiotic treatments                        | 132                  | 54.8              |
|                                                                                                                    | Public awareness of antibiotic resistance                     | 130                  | 53.9              |
|                                                                                                                    | Too many broad-spectrum antibiotics used                      | 123                  | 51.0              |
|                                                                                                                    | Poor biosecurity practices                                    | 68                   | 28.2              |
| In your opinion, which of the following are important challenges in the world today?*                              | Antibiotic resistance                                         | 195                  | 80.9              |
|                                                                                                                    | Food security                                                 | 180                  | 74.7              |
|                                                                                                                    | Climate change                                                | 146                  | 60.9              |
|                                                                                                                    | Gender inequality                                             | 40                   | 16.6              |
|                                                                                                                    | Obesity                                                       | 19                   | 7.9               |
| When there is poor biosecurity, prophylactic antibiotics are an appropriate alternative to protect animal health   | Disagree                                                      | 88                   | 36.5              |
|                                                                                                                    | Agree                                                         | 112                  | 46.5              |
|                                                                                                                    | Neither agree/nor disagree                                    | 41                   | 17.0              |
| Biosecurity is important in food production                                                                        | Disagree                                                      | 2                    | 0.8               |
|                                                                                                                    | Agree                                                         | 237                  | 98.3              |
|                                                                                                                    | Neither agree/nor disagree                                    | 2                    | 0.8               |
| Do veterinarians have a role to play in preventing public health threats posed by antibiotic resistance?           | No                                                            | 0                    | 0                 |
|                                                                                                                    | Yes                                                           | 240                  | 99.6              |
|                                                                                                                    | Unknown                                                       | 1                    | 0.4               |
| Do you believe that prescribing unnecessary antibiotics is professionally unethical?                               | No                                                            | 6                    | 2.5               |
|                                                                                                                    | Yes                                                           | 234                  | 97.1              |
|                                                                                                                    | Unknown                                                       | 1                    | 0.4               |
| Do you think that antibiotic resistance is a national problem?                                                     | No                                                            | 5                    | 2.1               |
|                                                                                                                    | Yes                                                           | 233                  | 96.7              |
|                                                                                                                    | Unknown                                                       | 3                    | 1.2               |
| Do you think we have enough antibiotics under development at the moment to keep up with the problem of resistance? | No                                                            | 145                  | 60.2              |
|                                                                                                                    | Yes                                                           | 59                   | 24.5              |
|                                                                                                                    | Unknown                                                       | 37                   | 15.4              |
| Do you think that antibiotic resistance will be a greater problem later in your career than it is today?           | No                                                            | 9                    | 3.7               |
|                                                                                                                    | Yes                                                           | 223                  | 92.5              |
|                                                                                                                    | Unknown                                                       | 9                    | 3.7               |
|                                                                                                                    | No                                                            | 48                   | 19.9              |

|                                                                                                           |         |     |      |
|-----------------------------------------------------------------------------------------------------------|---------|-----|------|
| Do you believe that the antibiotics you prescribe may contribute to the problem of antibiotic resistance? | Yes     | 172 | 71.4 |
|                                                                                                           | Unknown | 21  | 8.7  |
| Do you feel you have sufficient knowledge on antibiotic use?                                              | No      | 102 | 42.3 |
|                                                                                                           | Yes     | 117 | 48.5 |
|                                                                                                           | Unknown | 22  | 9.1  |

---

\* The results for this variable are presented as row percentages instead of column percentages, as such the column percentages for this variable do not add up to 100%.

**Table S3.** Contributors to antibiotic resistance, as reported by respondents

| <b>Of the following potential contributors to antibiotic resistance, which ones do you consider the most important? *</b> | <b>Frequency<br/>(n=241)</b> | <b>Percentage<br/>(%)</b> |
|---------------------------------------------------------------------------------------------------------------------------|------------------------------|---------------------------|
| Excessive use of antibiotics in livestock and food production                                                             | 202                          | 83.8                      |
| Under-dosing of antibiotics                                                                                               | 185                          | 76.8                      |
| Long duration of antibiotic treatments                                                                                    | 132                          | 54.8                      |
| Public awareness of antibiotic resistance                                                                                 | 130                          | 53.9                      |
| Too many broad-spectrum antibiotics used                                                                                  | 123                          | 51.0                      |
| Poor biosecurity practices                                                                                                | 68                           | 28.2                      |

\* The results for this variable are presented as row percentages instead of column percentages, as such the column percentages for this variable do not add up to 100%.

**Table S4.** Factors influencing antibiotic prescription practices and choice

| Variables                                                                                                                                               | Response                                                                  | Frequency<br>(n=241) | Percentage<br>(%) |
|---------------------------------------------------------------------------------------------------------------------------------------------------------|---------------------------------------------------------------------------|----------------------|-------------------|
| Does your practice have a standardized protocol for treating sick animals with antibiotics?                                                             | No                                                                        | 71                   | 29.5              |
|                                                                                                                                                         | Yes                                                                       | 154                  | 63.9              |
|                                                                                                                                                         | Don't know                                                                | 16                   | 6.6               |
| How often do you encounter owner-initiated antibiotic treatment before presentation?                                                                    | Never                                                                     | 13                   | 5.4               |
|                                                                                                                                                         | Sometimes (1-3 times a month)                                             | 75                   | 31.1              |
|                                                                                                                                                         | Frequently (> 3 times a month)                                            | 132                  | 54.8              |
|                                                                                                                                                         | Don't know                                                                | 21                   | 8.7               |
| When a patient presents for the first time and antibiotics are indicated, what guidelines do you follow to help you select the appropriate antibiotic?* | Empirical treatment whilst awaiting AST**                                 | 144                  | 59.8              |
|                                                                                                                                                         | Microbiological culture and AST                                           | 128                  | 53.1              |
|                                                                                                                                                         | Use whatever antibiotic is available                                      | 45                   | 18.7              |
|                                                                                                                                                         | Use whatever antibiotic the patient can afford                            | 35                   | 14.5              |
|                                                                                                                                                         | Don't know                                                                | 7                    | 2.9               |
| Which of the following guidelines influence your decision the most when selecting an antibiotic to use?*                                                | Veterinary education/training                                             | 191                  | 79.3              |
|                                                                                                                                                         | Prescription guidelines/policies supplied by vet hospital/bodies/entities | 166                  | 68.9              |
|                                                                                                                                                         | Product label/leaflet (manufacturer recommendations)                      | 155                  | 64.3              |
|                                                                                                                                                         | Legal restriction of drug to a defined species                            | 93                   | 38.6              |
|                                                                                                                                                         | Published literature                                                      | 85                   | 35.3              |
| Which of the following factors influence your decision the most important when selecting an antibiotic to use?*                                         | Owner ability to pay                                                      | 196                  | 81.3              |
|                                                                                                                                                         | Cost of antibiotic drug                                                   | 195                  | 80.9              |
|                                                                                                                                                         | Profit margin to vet                                                      | 66                   | 27.4              |
|                                                                                                                                                         | Marketing offers                                                          | 40                   | 16.6              |
|                                                                                                                                                         | Advertisement by drug representative                                      | 31                   | 12.9              |
|                                                                                                                                                         | Drug sellers                                                              | 20                   | 8.3               |
| Which of the following past experiences influence your decision the most important when selecting an antibiotic to use?*                                | Vet previous experience                                                   | 232                  | 96.3              |
|                                                                                                                                                         | Advice from colleagues                                                    | 164                  | 68.0              |
|                                                                                                                                                         | Owner preference for a specific antibiotic                                | 23                   | 9.5               |
| Of the following antibiotic characteristics, which ones influence your decision the most important when selecting an antibiotic to use?*                | Spectrum of action of antibiotic                                          | 206                  | 85.5              |
|                                                                                                                                                         | Sensitivity results/antibiogram                                           | 152                  | 63.1              |
|                                                                                                                                                         | Withdrawal period                                                         | 122                  | 50.6              |
|                                                                                                                                                         | Ease of administration                                                    | 107                  | 44.4              |
|                                                                                                                                                         | Risk of development of antibiotic resistance                              | 104                  | 43.2              |

\* The results for this variable are presented as row percentages instead of column percentages, as such the column percentages for this variable do not add up to 100%.

\*\* AST: antimicrobial susceptibility testing.

**Table S5.** Frequency of antimicrobial susceptibility testing (AST) use and barriers to AST use

| Variables                                                                                          | Response                                                                                  | Frequency<br>(n=241) | Percentage<br>(%) |
|----------------------------------------------------------------------------------------------------|-------------------------------------------------------------------------------------------|----------------------|-------------------|
| How often do you undertake antimicrobial sensitivity testing before starting antibiotic treatment? | Never                                                                                     | 69                   | 28.6              |
|                                                                                                    | Sometimes (1-3 times/month)                                                               | 112                  | 46.5              |
|                                                                                                    | Frequently (> 3 times/month)                                                              | 49                   | 20.3              |
|                                                                                                    | Don't know                                                                                | 11                   | 4.6               |
| Which of the following influence your decision the most when requesting AST?*                      | Poor response to initial antimicrobial therapy or therapeutic failure                     | 182                  | 75.5              |
|                                                                                                    | Recurrent conditions                                                                      | 170                  | 70.5              |
|                                                                                                    | No knowledge of farm or animal health status                                              | 64                   | 26.6              |
|                                                                                                    | Owner request                                                                             | 44                   | 18.3              |
| Of the following barriers to using AST, which barriers do you consider the most important?*        | Unavailability of lab services to conduct microbiological culture and sensitivity testing | 198                  | 82.2              |
|                                                                                                    | Owner unable or not willing to pay for culture and sensitivity testing                    | 173                  | 71.8              |
|                                                                                                    | Case is urgent, requires immediate antibiotic therapy                                     | 137                  | 56.8              |
|                                                                                                    | Long waiting time for sensitivity results                                                 | 85                   | 35.3              |
|                                                                                                    | Not sure of what to request from the lab                                                  | 8                    | 3.3               |

\* The results for this variable are presented as row percentages instead of column percentages, as such the column percentages for this variable do not add up to 100%.

**Table S6.** Practices and factors influencing respondents' decisions on selecting antibiotics and antimicrobial susceptibility testing (AST) use

| Variables                                                                                                                                               | Response                                                                                  | Frequency<br>(n=241) | Percentage<br>(%) |
|---------------------------------------------------------------------------------------------------------------------------------------------------------|-------------------------------------------------------------------------------------------|----------------------|-------------------|
| Does your practice have a standardised protocol for treating sick animals with antibiotics?                                                             | No                                                                                        | 71                   | 29.5              |
|                                                                                                                                                         | Yes                                                                                       | 154                  | 63.9              |
|                                                                                                                                                         | Don't know                                                                                | 16                   | 6.6               |
| How often do you encounter owner-initiated antibiotic treatment before presentation?                                                                    | Never                                                                                     | 13                   | 5.4               |
|                                                                                                                                                         | Sometimes (1-3 times a month)                                                             | 75                   | 31.1              |
|                                                                                                                                                         | Frequently (> 3 times a month)                                                            | 132                  | 54.8              |
|                                                                                                                                                         | Don't know                                                                                | 21                   | 8.7               |
| When a patient presents for the first time and antibiotics are indicated, what guidelines do you follow to help you select the appropriate antibiotic?* | Empirical treatment whilst awaiting MCS result                                            | 144                  | 59.8              |
|                                                                                                                                                         | Microbiological culture and sensitivity (MCS) testing                                     | 128                  | 53.1              |
|                                                                                                                                                         | Use whatever antibiotic is available                                                      | 45                   | 18.7              |
|                                                                                                                                                         | Use whatever antibiotic the patient can afford                                            | 35                   | 14.5              |
|                                                                                                                                                         | Don't know                                                                                | 7                    | 2.9               |
| How often do you undertake antimicrobial sensitivity testing before starting antibiotic treatment?                                                      | Never                                                                                     | 69                   | 28.6              |
|                                                                                                                                                         | Sometimes (1-3 times a month)                                                             | 112                  | 46.5              |
|                                                                                                                                                         | Frequently (more than 3 times a month)                                                    | 49                   | 20.3              |
|                                                                                                                                                         | Don't know                                                                                | 11                   | 4.6               |
| Which of the following influence your decision the most important when requesting antimicrobial sensitivity testing?*                                   | Poor response to initial antimicrobial therapy or therapeutic failure                     | 182                  | 75.5              |
|                                                                                                                                                         | Recurrent conditions                                                                      | 170                  | 70.5              |
|                                                                                                                                                         | No knowledge of farm or animal health status                                              | 64                   | 26.6              |
|                                                                                                                                                         | Owner request                                                                             | 44                   | 18.3              |
| Of the following barriers to using antimicrobial sensitivity testing, which barriers do you consider the most important?*                               | Unavailability of lab services to conduct microbiological culture and sensitivity testing | 198                  | 82.2              |
|                                                                                                                                                         | Owner unable or not willing to pay for culture and sensitivity testing                    | 173                  | 71.8              |
|                                                                                                                                                         | Case is urgent, requires immediate antibiotic therapy                                     | 137                  | 56.8              |
|                                                                                                                                                         | Long waiting time for sensitivity results                                                 | 85                   | 35.3              |
|                                                                                                                                                         | Not sure of what to request from the lab                                                  | 8                    | 3.3               |
| Which of the following guidelines influence your decision the most when selecting an antibiotic to use?*                                                | Veterinary education/training                                                             | 191                  | 79.3              |
|                                                                                                                                                         | Prescription guidelines/policies supplied by vet hospital/bodies/entities                 | 166                  | 68.9              |
|                                                                                                                                                         | Product label/leaflet (manufacturer recommendations)                                      | 155                  | 64.3              |
|                                                                                                                                                         | Legal restriction of drug to a defined species                                            | 93                   | 38.6              |
|                                                                                                                                                         | Published literature                                                                      | 85                   | 35.3              |
| Which of the following factors influence your                                                                                                           | Owner ability to pay                                                                      | 196                  | 81.3              |
|                                                                                                                                                         | Cost of antibiotic drug                                                                   | 195                  | 80.9              |



|                                                                                                                                          |                                              |     |      |
|------------------------------------------------------------------------------------------------------------------------------------------|----------------------------------------------|-----|------|
| decision the most important when selecting an antibiotic to use?*                                                                        | Profit margin to vet                         | 66  | 27.4 |
|                                                                                                                                          | Marketing offers                             | 40  | 16.6 |
|                                                                                                                                          | Advertisement by drug representative         | 31  | 12.9 |
|                                                                                                                                          | Drug sellers                                 | 20  | 8.3  |
| Which of the following past experiences influence your decision the most important when selecting an antibiotic to use?*                 | Vet previous experience                      | 232 | 96.3 |
|                                                                                                                                          | Advice from colleagues                       | 164 | 68.0 |
|                                                                                                                                          | Owner preference for a specific antibiotic   | 23  | 9.5  |
| Of the following antibiotic characteristics, which ones influence your decision the most important when selecting an antibiotic to use?* | Spectrum of action of antibiotic             | 206 | 85.5 |
|                                                                                                                                          | Sensitivity results/antibiogram              | 152 | 63.1 |
|                                                                                                                                          | Withdrawal period                            | 122 | 50.6 |
|                                                                                                                                          | Ease of administration                       | 107 | 44.4 |
|                                                                                                                                          | Risk of development of antibiotic resistance | 104 | 43.2 |

\* The results for this variable are presented as row percentages instead of column percentages, as such the column percentages for this variable do not add up to 100%.

**Table S7.** Relationship between the use of antimicrobial susceptibility testing (AST) before antibiotic treatment and select investigated variables.

| Variable                                                                      | Categories                                                   | Did not use AST<br>before antibiotics<br>treatment (%) n=69 | Used AST before<br>antibiotics treatment<br>(%) n=161 | P value |
|-------------------------------------------------------------------------------|--------------------------------------------------------------|-------------------------------------------------------------|-------------------------------------------------------|---------|
| Age group                                                                     | 25-34 years old                                              | 39 (56.5)                                                   | 72 (44.7)                                             | 0.207   |
|                                                                               | 35-44 years old                                              | 22 (31.9)                                                   | 59 (36.6)                                             |         |
|                                                                               | 45 years old or more                                         | 8 (11.6)                                                    | 30 (18.6)                                             |         |
| Gender                                                                        | Male                                                         | 54 (78.3)                                                   | 129 (80.1)                                            | 0.748   |
|                                                                               | Female                                                       | 15 (21.7)                                                   | 32 (19.9)                                             |         |
| Educational level                                                             | Veterinary degree                                            | 44 (63.8)                                                   | 99 (61.5)                                             | 0.744   |
|                                                                               | Additional education                                         | 25 (36.2)                                                   | 62 (38.5)                                             |         |
| Years in practice                                                             | 0-<5 years                                                   | 34 (49.3)                                                   | 48 (29.8)                                             | 0.049   |
|                                                                               | 5-10 years                                                   | 17 (24.6)                                                   | 56 (34.8)                                             |         |
|                                                                               | 10-15 years                                                  | 8 (11.6)                                                    | 21 (13)                                               |         |
|                                                                               | 16 years and above                                           | 10 (14.5)                                                   | 34 (21.1)                                             |         |
|                                                                               | Prefer not to say                                            | 0 (0)                                                       | 2 (1.2)                                               |         |
| Type of practice*                                                             | Mixed practice                                               | 51 (73.9)                                                   | 96 (59.6)                                             | 0.247   |
|                                                                               | Large animal practice                                        | 2 (2.9)                                                     | 13 (8.1)                                              |         |
|                                                                               | Poultry practice                                             | 4 (5.8)                                                     | 18 (11.2)                                             |         |
|                                                                               | Small animal practice                                        | 6 (8.7)                                                     | 19 (11.8)                                             |         |
|                                                                               | Other practice type                                          | 2 (2.9)                                                     | 8 (5)                                                 |         |
|                                                                               | Do not practice                                              | 4 (5.8)                                                     | 7 (4.3)                                               |         |
| Practice location*                                                            | South-West                                                   | 9 (13)                                                      | 29 (18)                                               | 0.369   |
|                                                                               | North-West                                                   | 17 (24.6)                                                   | 29 (18)                                               |         |
|                                                                               | South-South                                                  | 2 (2.9)                                                     | 14 (8.7)                                              |         |
|                                                                               | North-East                                                   | 17 (24.6)                                                   | 28 (17.4)                                             |         |
|                                                                               | North-Central                                                | 18 (26.1)                                                   | 46 (28.6)                                             |         |
|                                                                               | South-East                                                   | 6 (8.7)                                                     | 15 (9.3)                                              |         |
| Knowledge of<br>antimicrobial stewardship<br>(AMS)*                           | Never heard of AMS                                           | 50 (72.5)                                                   | 95 (59)                                               | 0.032   |
|                                                                               | All of three correct<br>definitions of AMS selected          | 16 (23.2)                                                   | 41 (25.5)                                             |         |
|                                                                               | At least one of three correct<br>definitions of AMS selected | 3 (4.3)                                                     | 25 (15.5)                                             |         |
| Knowledge of NCDC 5<br>points                                                 | No                                                           | 51 (73.9)                                                   | 85 (52.8)                                             | 0.003   |
|                                                                               | Yes                                                          | 18 (26.1)                                                   | 76 (47.2)                                             |         |
| Prophylactic use of<br>antibiotics is appropriate<br>when biosecurity is poor | Neither agree/nor disagree                                   | 17 (24.6)                                                   | 20 (12.4)                                             | 0.029   |
|                                                                               | Agree                                                        | 33 (47.8)                                                   | 74 (46)                                               |         |
| Owner initiated treatment                                                     | Disagree                                                     | 19 (27.5)                                                   | 67 (41.6)                                             | 0.059   |
|                                                                               | Never                                                        | 6 (8.7)                                                     | 6 (3.7)                                               |         |
|                                                                               | Frequently                                                   | 38 (55.1)                                                   | 91 (56.5)                                             |         |
|                                                                               | Sometimes                                                    | 14 (20.3)                                                   | 58 (36)                                               |         |
| AB treatment protocol in<br>practice                                          | Do not know                                                  | 11 (15.9)                                                   | 6 (3.7)                                               | <0.001  |
|                                                                               | No                                                           | 31 (44.9)                                                   | 34 (21.1)                                             |         |
|                                                                               | Yes                                                          | 32 (46.4)                                                   | 118 (73.3)                                            |         |
|                                                                               | Do not know                                                  | 6 (8.7)                                                     | 9 (5.6)                                               |         |

\*Fisher's exact test used. NCDC: Nigeria Center for Disease Control

**Table S8.** Relationship between knowledge level on appropriate antibiotic (AB) use and antimicrobial resistance (AMR) and select investigated variables.

| Variable                                                                 | Categories                             | Low-moderate knowledge (%)<br>n=42 | High knowledge (%)<br>n=198 | P value |
|--------------------------------------------------------------------------|----------------------------------------|------------------------------------|-----------------------------|---------|
| Age group*                                                               | 25-34 years old                        | 17 (40.5)                          | 99 (50)                     | 0.024   |
|                                                                          | 35-44 years old                        | 22 (52.4)                          | 63 (70.1)                   |         |
|                                                                          | 45 years old or more                   | 3 (7.1)                            | 36 (18.2)                   |         |
| Gender                                                                   | Male                                   | 35 (83.3)                          | 156 (78.8)                  | 0.507   |
|                                                                          | Female                                 | 7 (16.7)                           | 42 (21.2)                   |         |
| Educational level                                                        | Veterinary degree                      | 33 (78.6)                          | 119 (60.1)                  | 0.024   |
|                                                                          | Additional education/training          | 9 (21.4)                           | 79 (39.9)                   |         |
| Years in practice                                                        | 0-<5 years                             | 19 (45.2)                          | 68 (34.3)                   | 0.304   |
|                                                                          | 5-10 years                             | 11 (26.2)                          | 64 (32.3)                   |         |
|                                                                          | 10-15 years                            | 7 (16.7)                           | 23 (11.6)                   |         |
|                                                                          | 16 years and above                     | 5 (11.9)                           | 41 (20.7)                   |         |
|                                                                          | Prefer not to say                      | 0 (0)                              | 2 (1)                       |         |
| Type of practice*                                                        | Mixed practice                         | 28 (66.7)                          | 125 (63.1)                  | 0.806   |
|                                                                          | Large animal practice                  | 4 (9.5)                            | 13 (6.6)                    |         |
|                                                                          | Poultry practice                       | 3 (7.1)                            | 20 (10.1)                   |         |
|                                                                          | Small animal practice                  | 3 (7.1)                            | 22 (11.1)                   |         |
|                                                                          | Other practice type                    | 1 (2.4)                            | 9 (4.5)                     |         |
|                                                                          | Do not practice                        | 3 (7.1)                            | 9 (4.5)                     |         |
| Employment type                                                          | Private practice                       | 19 (45.2)                          | 73 (36.9)                   | 0.659   |
|                                                                          | Government employee                    | 15 (35.7)                          | 60 (30.3)                   |         |
|                                                                          | Non-governmental organisation employee | 4 (9.5)                            | 18 (9.1)                    |         |
|                                                                          | Teaching                               | 3 (7.1)                            | 22 (11.1)                   |         |
|                                                                          | Research                               | 1 (2.4)                            | 14 (7.1)                    |         |
|                                                                          | Other                                  | 0 (0)                              | 11 (5.6)                    |         |
| Practice location*                                                       | South-West                             | 9 (21.4)                           | 30 (15.2)                   | 0.872   |
|                                                                          | North-West                             | 9 (21.4)                           | 40 (20.2)                   |         |
|                                                                          | South-South                            | 3 (7.1)                            | 14 (7.1)                    |         |
|                                                                          | North-East                             | 8 (19)                             | 38 (19.2)                   |         |
|                                                                          | North-Central                          | 11 (26.2)                          | 57 (28.8)                   |         |
|                                                                          | South-East                             | 2 (4.8)                            | 19 (9.6)                    |         |
| Heard of antimicrobial stewardship before?                               | No                                     | 28 (66.7)                          | 123 (62.1)                  | 0.58    |
|                                                                          | Yes                                    | 14 (33.3)                          | 75 (37.9)                   |         |
| Knowledge of NCDC 5 points                                               | No                                     | 25 (59.5)                          | 118 (59.6)                  | 0.993   |
|                                                                          | Yes                                    | 17 (40.5)                          | 80 (40.4)                   |         |
| Prophylactic use of antibiotics is appropriate when biosecurity is poor* | Neither agree/nor disagree             | 13 (31)                            | 28 (14.1)                   | <0.001  |
|                                                                          | Agree                                  | 27 (64.3)                          | 84 (42.4)                   |         |
|                                                                          | Disagree                               | 2 (4.8)                            | 86 (43.4)                   |         |
| AB treatment protocol in practice                                        | No                                     | 11 (26.2)                          | 60 (30.3)                   | 0.62    |
|                                                                          | Yes                                    | 28 (66.7)                          | 126 (63.6)                  |         |
|                                                                          | Do not know                            | 3 (7.1)                            | 12 (6.1)                    |         |

|                                |             |           |            |       |
|--------------------------------|-------------|-----------|------------|-------|
| Use of AST before AB treatment | No          | 11 (12.1) | 58 (28.3)  | 0.704 |
|                                | Yes         | 29 (69)   | 132 (66.7) |       |
|                                | Do not know | 2 (4.8)   | 8 (4)      |       |

---

\*Fisher's exact test used. NCDC: Nigeria Center for Disease Control. AST: antimicrobial susceptibility testing.

**Table S9.** Scoring of knowledge level on appropriate antibiotic (AB) use and antimicrobial resistance (AMR). For each question, a score was assigned based on the response with 0 given for an incorrect response and 1 for a correct response.

| Variables                                                                                                                          | Response                                         | Frequency<br>(n=241) | Percentage (%) | Score | Total<br>max<br>score |
|------------------------------------------------------------------------------------------------------------------------------------|--------------------------------------------------|----------------------|----------------|-------|-----------------------|
| Antibiotics kill or stop the growth of both good and bad bacteria                                                                  | True                                             | 220                  | 91.3           | 1     | 1                     |
|                                                                                                                                    | False                                            | 20                   | 8.3            | 0     |                       |
|                                                                                                                                    | Unknown                                          | 1                    | 0.4            | 0     |                       |
| Antibiotics kill viruses                                                                                                           | True                                             | 10                   | 4.2            | 0     | 1                     |
|                                                                                                                                    | False                                            | 225                  | 93.4           | 1     |                       |
|                                                                                                                                    | Unknown                                          | 6                    | 2.5            | 0     |                       |
| Bacteria can become resistant to antibiotics                                                                                       | True                                             | 241                  | 100            | 1     | 1                     |
|                                                                                                                                    | False                                            | 0.0                  | 0.0            | 0     |                       |
|                                                                                                                                    | Unknown                                          | 0.0                  | 0.0            | 0     |                       |
| Healthy people and animals can carry antibiotic resistant bacteria                                                                 | Agree                                            | 190                  | 78.8           | 1     | 1                     |
|                                                                                                                                    | Neither agree/nor disagree                       | 26                   | 10.8           | 0     |                       |
|                                                                                                                                    | Disagree                                         | 0                    | 0.0            | 0     |                       |
| In what microbes is antibiotic resistance a major problem?                                                                         | Bacteria alone                                   | 150                  | 62.24          | 1     | 1                     |
|                                                                                                                                    | Bacteria and/or other pathogens (Fungi, viruses) | 91                   | 37.75          | 0     |                       |
| Do you think overuse of antibiotics can lead to development of resistant organisms?                                                | No                                               | 6                    | 2.5            | 0     | 1                     |
|                                                                                                                                    | Yes                                              | 227                  | 94.2           | 1     |                       |
|                                                                                                                                    | Don't know                                       | 8                    | 3.3            | 0     |                       |
| A withdrawal period does not have to be observed for milking cows treated with antibiotics before milk can be consumed             | True                                             | 14                   | 5.8            | 0     | 1                     |
|                                                                                                                                    | False                                            | 225                  | 93.4           | 1     |                       |
|                                                                                                                                    | Unknown                                          | 2                    | 0.8            | 0     |                       |
| A withdrawal period must be strictly observed in treated poultry before any poultry product is passed as fit for human consumption | True                                             | 236                  | 97.9           | 1     | 1                     |
|                                                                                                                                    | False                                            | 4                    | 1.7            | 0     |                       |
|                                                                                                                                    | Unknown                                          | 1                    | 0.4            | 0     |                       |
| When there is poor biosecurity, prophylactic antibiotics are an appropriate alternative to protect animal health                   | Disagree                                         | 88                   | 36.5           | 1     | 1                     |
|                                                                                                                                    | Agree                                            | 112                  | 46.5           | 0     |                       |
|                                                                                                                                    | Neither agree/nor disagree                       | 41                   | 17.0           | 0     |                       |
|                                                                                                                                    |                                                  |                      |                |       |                       |
